# Supplementary material for: Characteristics of Hospital Emergency Room Visits for Mental and Substance Use Disorders
Source: Atypon-hosted journal article supplement (doi:10.1176/appi.ps.201600125), 2016-12-15
Supplement: appi.ps.201600125.ds001.pdf [file appi.ps.201600125.ds001.pdf]

**Online Appendix Table 1: Comparison of ER use for mental illness and substance-related conditions between 2005 and 2011**

|                         | <b>2005</b> |                  |              | <b>2011</b> |                  |               |
|-------------------------|-------------|------------------|--------------|-------------|------------------|---------------|
|                         | <b>N</b>    | <b>Rate/1000</b> | <b>95%CI</b> | <b>N</b>    | <b>Rate/1000</b> | <b>95%CI</b>  |
| <b>Total</b>            | 3,224,237   | 27.96            | 23.4 - 32.6  | 4,784,092   | 35.1             | 30.3 - 39.9   |
| <b>Gender</b>           |             |                  |              |             |                  |               |
| Male                    | 1,749,757   | 32.9             | 27.2 - 38.6  | 2,384,952   | 38.7             | 32.5 - 44.9   |
| Female                  | 1,474,480   | 23.7             | 19.3 - 28.2  | 2,399,140   | 32.2             | 27.4 - 36.9   |
| <b>Race</b>             |             |                  |              |             |                  |               |
| Hispanic                | 411,334     | 25.3             | 16.6 - 33.9  | 442,409     | 23.03            | 16.5 - 29.6   |
| Black                   | 634,879     | 27.2             | 19.4 - 34.9  | 947,362     | 30.04            | 22.3 - 37.8   |
| White                   | 2,106,571   | 29.4             | 24.2 - 34.5  | 3,284,687   | 40.4             | 33.8 - 47.01  |
| <b>Age</b>              |             |                  |              |             |                  |               |
| Less than 18y           | 513,354     | 17.8             | 10.8 - 24.7  | 666,901     | 22.7             | 17.6 - 27.7   |
| 18-24y                  | 437,470     | 35.5             | 27.2 - 43.7  | 582,052     | 38.04            | 27.9 - 48.2   |
| 25-44y                  | 1,086,542   | 32.7             | 25.7 - 39.7  | 1,655,893   | 42.3             | 34.9 - 49.7   |
| 45-64                   | 726,402     | 32.8             | 26.7 - 38.8  | 1,114,568   | 37.4             | 30.2 - 44.5   |
| 65+                     | 409,782     | 24.5             | 18.7 - 30.3  | 564,426     | 27.7             | 20.0 - 35.4   |
| <b>Region</b>           |             |                  |              |             |                  |               |
| Northeast               | 805,733     | 36.2             | 26.3 - 46.1  | 1,126,467   | 46.4             | 31.2 - 61.7   |
| South                   | 850,668     | 19.4             | 14.01 - 24.8 | 1,731,746   | 31.3             | 24.9 - 37.6   |
| Midwest                 | 975,047     | 33.9             | 20.5 - 47.3  | 1,145,512   | 38.3             | 26.1 - 50.5   |
| West                    | 592,789     | 29.01            | 20.1 - 38.0  | 780,367     | 29.2             | 21.9 - 36.6   |
| <b>Residence</b>        |             |                  |              |             |                  |               |
| Nursing home            | 102,135     | 46.5             | 26.1 - 66.9  | 243,515     | 95.2             | 54.02 - 136.4 |
| Homeless                | 85,110      | 180.0            | 87.3 - 272.7 | 189,692     | 173.7            | 103.2 - 244.1 |
| Private residence       | 2,733,000   | 26.0             | 21.5 - 30.4  | 3,935,890   | 31.2             | 26.9 - 35.5   |
| <b>Insurance status</b> |             |                  |              |             |                  |               |
| Uninsured               | 702,853     | 32.5             | 23.7 - 41.3  | 1,417,216   | 41.8             | 33.8 - 49.8   |
| Private insurance       | 804,266     | 20.3             | 14.6 - 26.0  | 1,118,705   | 29.1             | 23.7 - 34.5   |
| Medicare                | 450,971     | 43.2             | 28.8 - 57.6  | 460,695     | 40.2             | 29.2 - 51.1   |
| Medicaid                | 729,359     | 29.3             | 21.7 - 36.9  | 1,190,230   | 32.7             | 25.9 - 39.5   |
